# Supplementary material for: New insights on the evolutionary relationships between the major lineages of Amoebozoa
Source: PubMed Central journal article supplement (PMC9249873; doi:10.1038/s41598-022-15372-7), 2022-07-01
Supplement: 41598_2022_15372_MOESM2_ESM.pdf [file 41598_2022_15372_MOESM2_ESM.pdf]

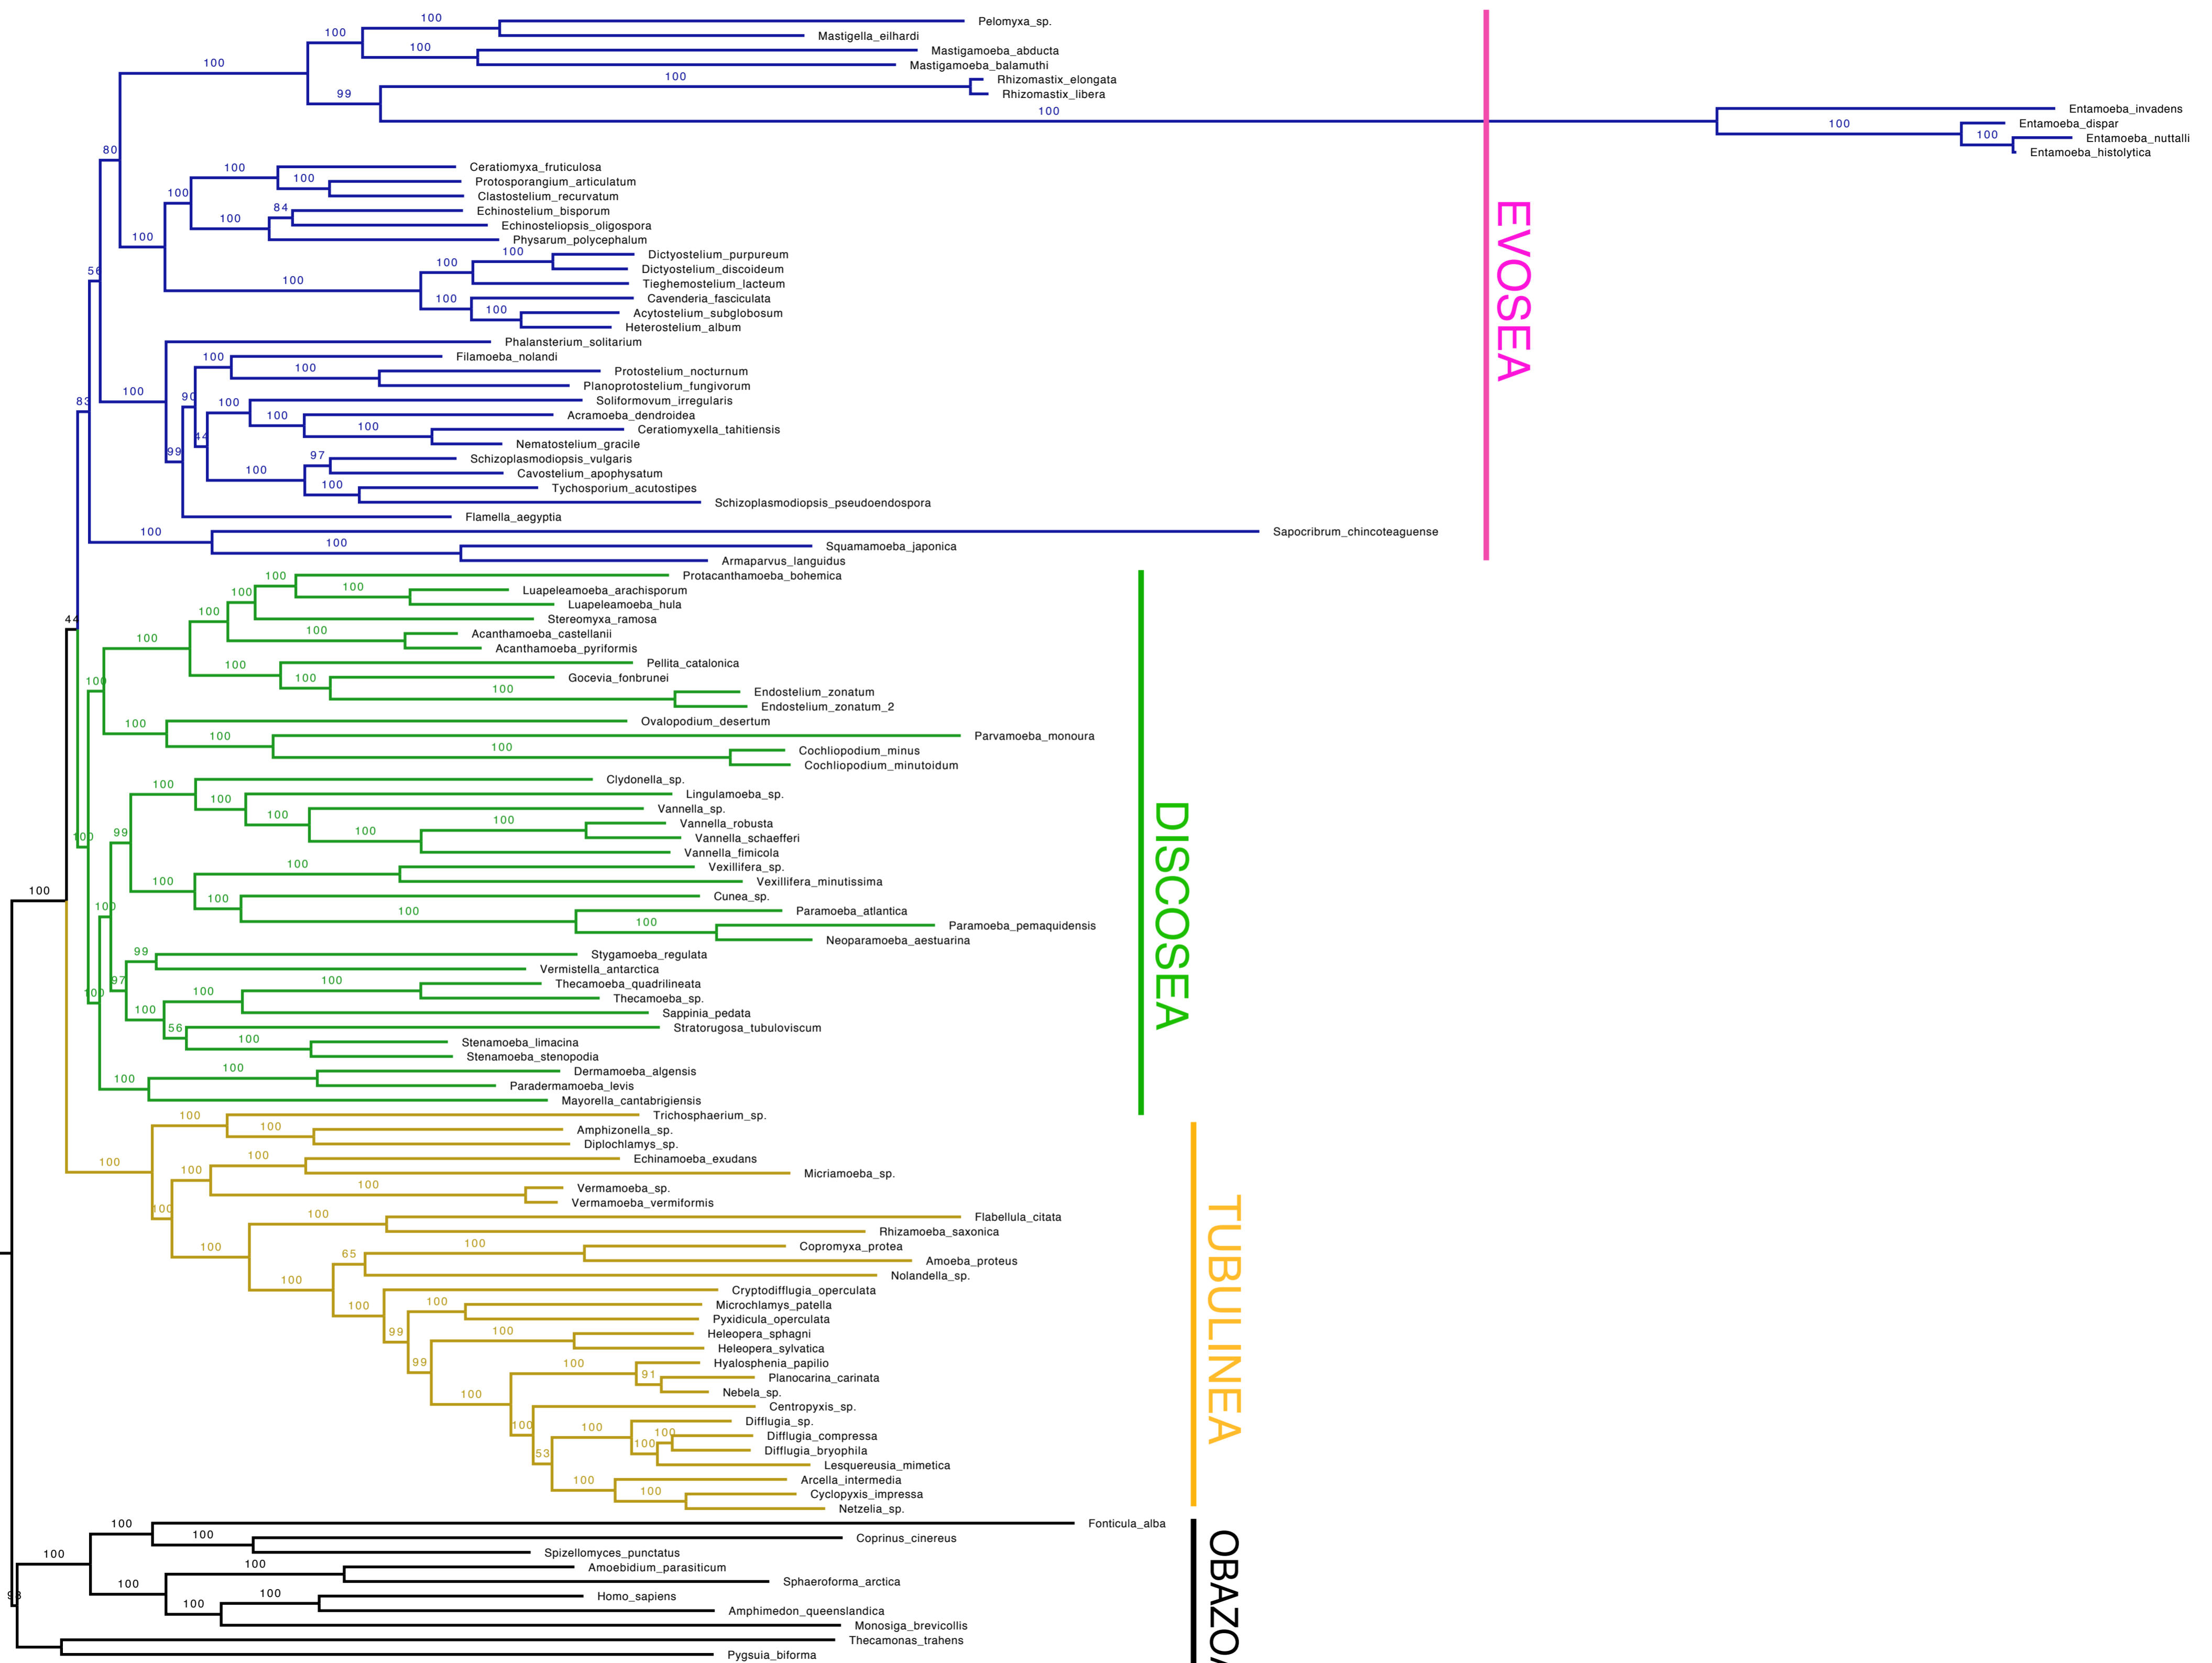

EVOSEA

DISCOSEA

TUBULINEA

OBAZOA
